# Supplementary material for: Antimicrobial Resistance Profiles and Genes of Staphylococci Isolated from Mastitic Cow’s Milk in Kenya
Source: MDPI journal article supplement (doi:10.3390/antibiotics10070772), 2021-06-24
Supplement: s1 [file s1]

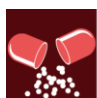

## Supplementary Table

**Table S1.** Antimicrobial resistance profile of staphylococci recovered from dairy cows' mastitis cases from two counties, Kenya.

| Isolate ID           | Antibiotic Resistant gene expressed | Phenotypic resistance profile             |
|----------------------|-------------------------------------|-------------------------------------------|
| 457(1) <sup>1</sup>  | <i>blaZ, tetM, ermB, msrA</i>       | AMP, FOX, ERY, TET                        |
| 803(1) <sup>2</sup>  | <i>blaZ, strB, msrA</i>             | AMP, FOX, STR, ERY, NX                    |
| 657 <sup>1</sup>     | <i>blaZ, tetM, ermB</i>             | AMP, FOX, TET                             |
| 379 <sup>1</sup>     | <i>blaZ, strB, msrA</i>             | AMP, SXT, STR, ERY, TET                   |
| 525 <sup>1</sup>     | <i>blaZ, strB, msrA</i>             | AMP, STR, ERY, TET                        |
| 1510(1) <sup>2</sup> | <i>blaZ, tetM, msrA</i>             | AMP, FOX, C, ERY, TET, CIP                |
| 244 <sup>2</sup>     | <i>tetM, strB, ermB</i>             | AMP, FOX, SXT, STR, GEN, TET, C           |
| 1530 <sup>2</sup>    | <i>blaZ, strB, ermB</i>             | AMP, FOX, SXT, STR, GEN, ERY, TET, CIP, C |
| 683 <sup>2</sup>     | <i>blaZ, tetM, strB</i>             | AMP, FOX, STR, TET                        |
| 37 <sup>1</sup>      | <i>blaZ, strB</i>                   | AMP, FOX, SXT, STR, ERY, TET              |
| 65(4) <sup>1</sup>   | <i>blaZ, msrA</i>                   | AMP, FOX, SXT, STR, ERY, GEN, TET, C      |
| 242(2) <sup>1</sup>  | <i>blaZ, strB</i>                   | AMP, FOX, STR, ERY, GEN, TET, C           |
| 247(2) <sup>1</sup>  | <i>blaZ, ermB</i>                   | AMP, FOX, STR, GEN, ERY, TET, NX, C,      |
| 5(KRF) <sup>1</sup>  | <i>blaZ, msrA</i>                   | AMP, FOX, SXT, ERY                        |
| 482(2) <sup>1</sup>  | <i>blaZ, tetM</i>                   | AMP, FOX, TET,                            |
| 1338 <sup>1</sup>    | <i>blaZ, msrA</i>                   | AMP, SXT, ERY, CIP                        |
| 908(1) <sup>1</sup>  | <i>blaZ, tetM</i>                   | AMP, STR, SXT, TET                        |
| 253(1) <sup>1</sup>  | <i>blaZ, tetM</i>                   | AMP, TET                                  |
| 187 <sup>1</sup>     | <i>blaZ, strB</i>                   | AMP, STR, TET                             |
| 474 <sup>1</sup>     | <i>blaZ, strB</i>                   | AMP, SXT, STR, ERY, TET                   |
| 806 <sup>2</sup>     | <i>blaZ, strB</i>                   | AMP, TET                                  |
| 1512 <sup>2</sup>    | <i>blaZ, tetM</i>                   | AMP, TET                                  |
| 1604 <sup>2</sup>    | <i>blaZ, ermB</i>                   | AMP, FOX, SXT, ERY, TET                   |
| 1579 <sup>2</sup>    | <i>blaZ, msrA</i>                   | AMP, SXT, STR, GEN, ERY, C                |
| 1247 <sup>2</sup>    | <i>blaZ, tetM</i>                   | AMP, TET, C                               |
| 1189 <sup>2</sup>    | <i>blaZ, strB</i>                   | AMP, STR, NX                              |
| 1609 <sup>2</sup>    | <i>blaZ, ermB</i>                   | AMP, ERY                                  |
| 472(2) <sup>2</sup>  | <i>blaZ, strB</i>                   | AMP, FOX, STR                             |
| 1178 <sup>2</sup>    | <i>blaZ, tetM</i>                   | AMP, ERY, CIP, TET                        |

Only staphylococci isolates carrying  $\geq 2$  antibiotic resistant genes are shown in Table S1; <sup>1</sup>*Staphylococcus aureus*, <sup>2</sup>Coagulase-negative staphylococci, FOX cefoxitin, AMP ampicillin, ERY erythromycin, TET tetracycline, C chloramphenicol, GEN gentamicin, STR streptomycin, SXT trimethoprim-sulfamethoxazole, CIP ciprofloxacin and NX, norfloxacin.
